# Supplementary material for: A multifunctional sponge incorporated with TiO2and graphene oxide as a reusable absorbent for oil/water separation and dye absorption
Source: Royal Society of Chemistry journal article supplement (doi:10.1039/d0nj06298g), 2021-01-01
Supplement: d0nj06298g1.pdf [file d0nj06298g1.pdf]

## Supplementary information

A multifunctional sponge incorporated with TiO<sub>2</sub> and graphene oxide as  
reusable absorbent for oil/water separation and dye absorption

Jian Zhou<sup>a</sup>, Yan Zhang<sup>a\*</sup>, Guangwen Jia<sup>a</sup>, Zhenfei Chen<sup>a</sup>, Yongqiang Yang<sup>b\*</sup>

<sup>a</sup>School of Material Engineering, Shanghai University of Engineering Science, Shanghai 201620,  
P.R. China;

<sup>b</sup>National Graphene Products Quality Supervision and Inspection Center (Jiangsu), Jiangsu  
Province Special Equipment Safety Supervision Inspection Institute Branch of Wuxi, Yanxin  
Road 330, Wuxi 214174, P.R. China;

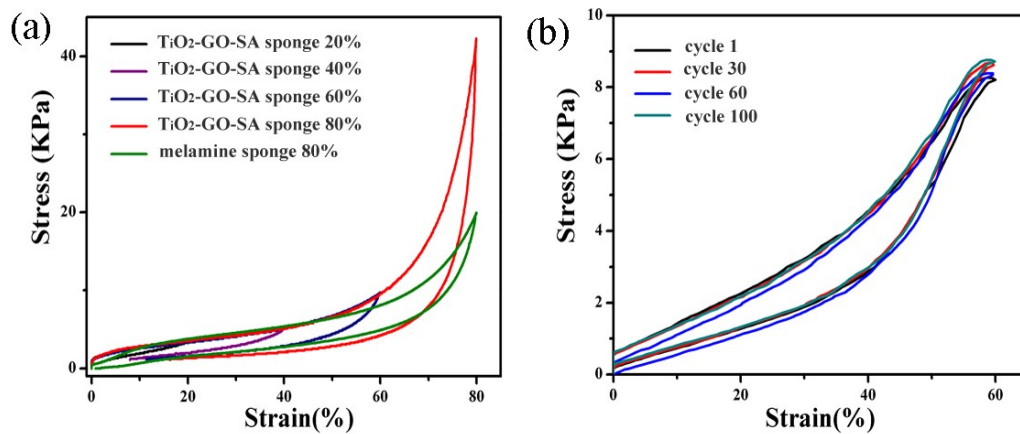

Figure S1. Mechanical stability of TiO<sub>2</sub>-GO-SA sponge. Stress-strain curves of TiO<sub>2</sub>-GO-SA sponge (a) under different amount of compressions (40 %, 60 %, 80 %) and (b) after 100 cycles of 60 % compression.

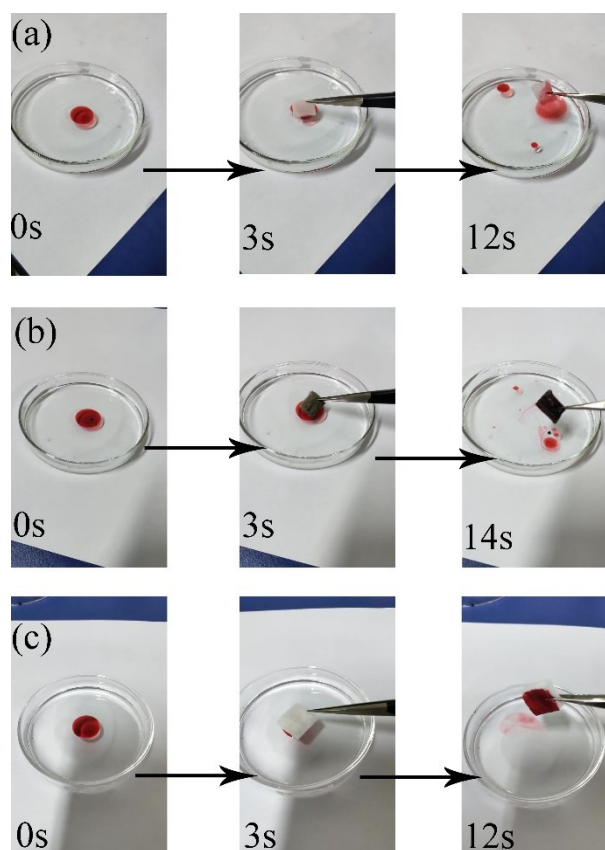

Figure S2. Photographs of the rapid process by which (a) melamine sponge, (b) GO sponge (c) TiO<sub>2</sub> sponge absorb pump oil on the water surface.

Table S1 Isotherm parameters for the absorption of organic dyes onto TiO<sub>2</sub>-GO-SA sponge

| Dyes | Model      | Parameters           | R <sup>2</sup>        |         |
|------|------------|----------------------|-----------------------|---------|
| R6g  | Langmuir   | $K_L=0.0070$<br>L/mg | $q_m=137.174$<br>mg/g | 0.97876 |
|      | Freundlich | $K_F=4.151$          | $n=1.818$             | 0.98555 |
| MG   | Langmuir   | $K_L=0.0027$<br>L/mg | $q_m=117.786$<br>mg/g | 0.973   |
|      | Freundlich | $K_F=0.796$          | $n=1.3525$            | 0.992   |
| MB   | Langmuir   | $K_L=0.0093$<br>L/mg | $q_m=62.422$<br>mg/g  | 0.98772 |
|      | Freundlich | $K_F=2.520$          | $n=1.919$             | 0.98357 |

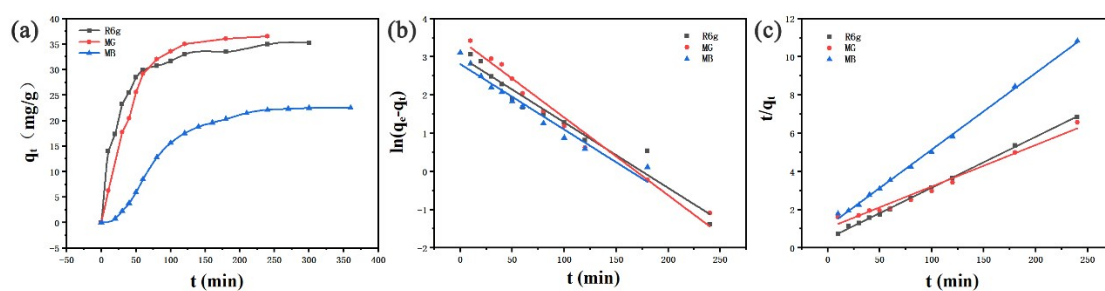

Figure S3. (a) Absorption kinetics, (b) pseudo-first-order model, and (c) pseudo-second-order model of R6G, MG and MB onto TiO<sub>2</sub>-GO-SA sponge.
